# Supplementary material for: The Stable Matching Problem in TBEV Enzootic Circulation: How Important Is the Perfect Tick-Virus Match?
Source: PubMed Central journal article supplement (PMC7833397; doi:10.3390/microorganisms9010196), 2021-01-19
Supplement: microorganisms-09-00196-s001.pdf [file microorganisms-09-00196-s001.pdf]

|                           |                        | 2020          |              |             |             |             |             |
|---------------------------|------------------------|---------------|--------------|-------------|-------------|-------------|-------------|
|                           |                        | April         |              | May         |             | June        |             |
| Tick origin/virus isolate |                        | Barsinghausen | Rauher Busch | Haselmühl   | Heselbach   | Haselmühl   | Heselbach   |
|                           | Feeding rate (%)       | 24 (105/444)  | 20 (101/500) | 32 (45/141) | 26 (41/158) | 20 (23/113) | 20 (20/102) |
|                           | Loss during incubation | 12            | 9            | 0           | 0           | 0           | 0           |
| P51 (Barsinghausen)       | Infection rate (%)     | 92 (24/26)    | 98 (54/55)   |             |             |             |             |
| P19 (Rauher Busch)        | Infection rate (%)     | 90 (60/67)    | 100 (37/37)  |             |             |             |             |
| 303/16 (Haselmühl)        | Infection rate (%)     |               |              | 95 (19/20)  | 79 (11/14)  | 100 (7/7)   | 67 (4/6)    |
| HB171 (Heselbach)         | Infection rate (%)     |               |              | 88 (22/25)  | 100 (27/27) | 81 (13/16)  | 100 (14/14) |

**Supplementary Table S1:** Feeding and Infection rates of *Ixodes ricinus* ticks collected in spring 2020 and infected with TBEV

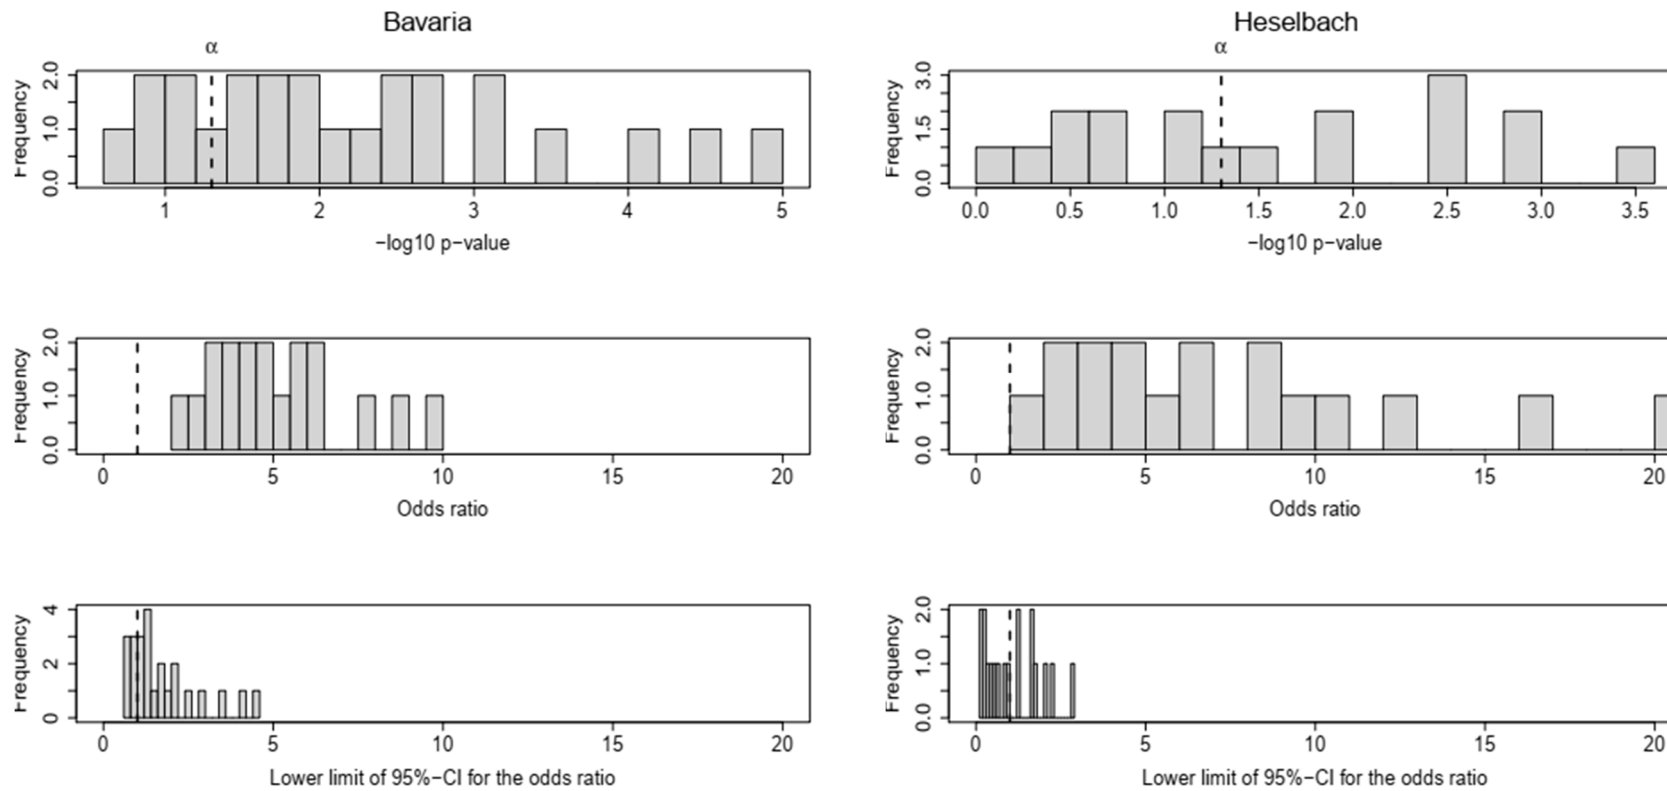

**Supplementary Figure S1:** Distribution of p-values, odds ratios and lower limits of 95%-confidence intervals (CI) for the odds ratio under 1, 2 or 3 misclassifications in the comparison of synonymy and TBEV infection of ticks with respect to finding in both Bavarian sites or only in Heselbach.
